# Supplementary material for: Comparing Artificial Neural Networks, General Linear Models and Support Vector Machines in Building Predictive Models for Small Interfering RNAs
Source: PLoS One. 2009 Oct 22;4(10):e7522. doi: 10.1371/journal.pone.0007522 (PMC2760777; doi:10.1371/journal.pone.0007522)
Supplement: Table S2 — cross validation grid search for optimized SVM parameters (0.10 MB XLS) [file pone.0007522.s002.xls]

## Sheet: Sheet1
							max	0.640681	0.0409228	0.587363	0.0509116	0.27696	0.0405308	0.32046	0.0408699	0.158682	0.0413844	0.644535	0.0407703	0.630726	0.0407147	0.66005	0.0544557
							min	0.531808	0.0256261	0.325779	0.0277068	0.20703	0.0379677	0.249314	0.0369925	0.143566	0.0409005	0.392419	0.0251064	0.364904	0.0254882	0.332361	0.0239497
								PSBC	PSBC	THER	THER	F	F	NG2-5	NG2-5	X	X	P+13	P+13	P+NG2-5	P+NG2-5	all	all
kernel type	svm type	degree	gamma	coef0	Cost	nu	epsilon	R	MSE	R	MSE	R	MSE	R	MSE	R	MSE	R	MSE	R	MSE	R	MSE
2	3	1	1e-05	0	1	0	0.001	0.619425	0.0398862	0.446281	0.0343462	0.229098	0.0395535	0.266393	0.040282	0.152631	0.0413844	0.500084	0.0392131	0.470778	0.038911	0.502586	0.0325919
2	3	1	1e-05	0	1	0	0.301	0.599502	0.0404869	0.402737	0.0364171	0.216623	0.0399536	0.256929	0.0405103	0.143566	0.0411477	0.465572	0.0400679	0.435379	0.0399178	0.4443	0.0351841
2	3	1	1e-05	0	1	0	0.601	0.534402	0.0409228	0.325779	0.0383055	0.20703	0.0405308	0.254541	0.0408699	0.156933	0.0411127	0.392419	0.0407703	0.364904	0.0407147	0.332361	0.0372362
2	3	1	1e-05	0	1	1	0.001	0.619425	0.0398862	0.446281	0.0343462	0.229098	0.0395535	0.266393	0.040282	0.152631	0.0413844	0.500084	0.0392131	0.470778	0.038911	0.502586	0.0325919
2	3	1	1e-05	0	1	1	0.301	0.599502	0.0404869	0.402737	0.0364171	0.216623	0.0399536	0.256929	0.0405103	0.143566	0.0411477	0.465572	0.0400679	0.435379	0.0399178	0.4443	0.0351841
2	3	1	1e-05	0	1	1	0.601	0.534402	0.0409228	0.325779	0.0383055	0.20703	0.0405308	0.254541	0.0408699	0.156933	0.0411127	0.392419	0.0407703	0.364904	0.0407147	0.332361	0.0372362
2	3	1	1e-05	0	6	0	0.001	0.625218	0.034693	0.544663	0.0300494	0.254363	0.0386169	0.280174	0.0383721	0.153109	0.0413544	0.569695	0.0334435	0.559364	0.0331257	0.621361	0.0269464
2	3	1	1e-05	0	6	0	0.301	0.60314	0.0379921	0.510137	0.0322608	0.24455	0.0389011	0.264877	0.0392279	0.143989	0.0411235	0.519606	0.0370496	0.485593	0.0367456	0.581508	0.0300172
2	3	1	1e-05	0	6	0	0.601	0.53372	0.0402355	0.396504	0.0358985	0.223219	0.0395742	0.251543	0.0400468	0.156933	0.0411081	0.400961	0.0393927	0.370107	0.0392588	0.441091	0.0544557
2	3	1	1e-05	0	6	1	0.001	0.625218	0.034693	0.544663	0.0300494	0.254363	0.0386169	0.280174	0.0383721	0.153109	0.0413544	0.569695	0.0334435	0.559364	0.0331257	0.621361	0.0269464
2	3	1	1e-05	0	6	1	0.301	0.60314	0.0379921	0.510137	0.0322608	0.24455	0.0389011	0.264877	0.0392279	0.143989	0.0411235	0.519606	0.0370496	0.485593	0.0367456	0.581508	0.0300172
2	3	1	1e-05	0	6	1	0.601	0.53372	0.0402355	0.396504	0.0358985	0.223219	0.0395742	0.251543	0.0400468	0.156933	0.0411081	0.400961	0.0393927	0.370107	0.0392588	0.441091	0.0544557
2	3	1	1e-05	0	11	0	0.001	0.629042	0.0318102	0.556733	0.0291356	0.261557	0.038403	0.288814	0.0378962	0.153638	0.0413171	0.59937	0.0308025	0.59332	0.0304599	0.64099	0.025567
2	3	1	1e-05	0	11	0	0.301	0.606574	0.0361247	0.527967	0.0310066	0.251942	0.0386067	0.273803	0.0385666	0.144042	0.0410998	0.537538	0.0350264	0.511695	0.0347409	0.608052	0.0273203
2	3	1	1e-05	0	11	0	0.601	0.531808	0.0395624	0.432316	0.0350282	0.231604	0.0393009	0.249314	0.0395446	0.156933	0.0411035	0.41998	0.0385154	0.385964	0.0384453	0.508327	0.0343501
2	3	1	1e-05	0	11	1	0.001	0.629042	0.0318102	0.556733	0.0291356	0.261557	0.038403	0.288814	0.0378962	0.153638	0.0413171	0.59937	0.0308025	0.59332	0.0304599	0.64099	0.025567
2	3	1	1e-05	0	11	1	0.301	0.606574	0.0361247	0.527967	0.0310066	0.251942	0.0386067	0.273803	0.0385666	0.144042	0.0410998	0.537538	0.0350264	0.511695	0.0347409	0.608052	0.0273203
2	3	1	1e-05	0	11	1	0.601	0.531808	0.0395624	0.432316	0.0350282	0.231604	0.0393009	0.249314	0.0395446	0.156933	0.0411035	0.41998	0.0385154	0.385964	0.0384453	0.508327	0.0343501
2	3	1	1e-05	1	1	0	0.001	0.619425	0.0398862	0.446281	0.0343462	0.229098	0.0395535	0.266393	0.040282	0.152631	0.0413844	0.500084	0.0392131	0.470778	0.038911	0.502586	0.0325919
2	3	1	1e-05	1	1	0	0.301	0.599502	0.0404869	0.402737	0.0364171	0.216623	0.0399536	0.256929	0.0405103	0.143566	0.0411477	0.465572	0.0400679	0.435379	0.0399178	0.4443	0.0351841
2	3	1	1e-05	1	1	0	0.601	0.534402	0.0409228	0.325779	0.0383055	0.20703	0.0405308	0.254541	0.0408699	0.156933	0.0411127	0.392419	0.0407703	0.364904	0.0407147	0.332361	0.0372362
2	3	1	1e-05	1	1	1	0.001	0.619425	0.0398862	0.446281	0.0343462	0.229098	0.0395535	0.266393	0.040282	0.152631	0.0413844	0.500084	0.0392131	0.470778	0.038911	0.502586	0.0325919
2	3	1	1e-05	1	1	1	0.301	0.599502	0.0404869	0.402737	0.0364171	0.216623	0.0399536	0.256929	0.0405103	0.143566	0.0411477	0.465572	0.0400679	0.435379	0.0399178	0.4443	0.0351841
2	3	1	1e-05	1	1	1	0.601	0.534402	0.0409228	0.325779	0.0383055	0.20703	0.0405308	0.254541	0.0408699	0.156933	0.0411127	0.392419	0.0407703	0.364904	0.0407147	0.332361	0.0372362
2	3	1	1e-05	1	6	0	0.001	0.625218	0.034693	0.544663	0.0300494	0.254363	0.0386169	0.280174	0.0383721	0.153109	0.0413544	0.569695	0.0334435	0.559364	0.0331257	0.621361	0.0269464
2	3	1	1e-05	1	6	0	0.301	0.60314	0.0379921	0.510137	0.0322608	0.24455	0.0389011	0.264877	0.0392279	0.143989	0.0411235	0.519606	0.0370496	0.485593	0.0367456	0.581508	0.0300172
2	3	1	1e-05	1	6	0	0.601	0.53372	0.0402355	0.396504	0.0358985	0.223219	0.0395742	0.251543	0.0400468	0.156933	0.0411081	0.400961	0.0393927	0.370107	0.0392588	0.441091	0.0544557
2	3	1	1e-05	1	6	1	0.001	0.625218	0.034693	0.544663	0.0300494	0.254363	0.0386169	0.280174	0.0383721	0.153109	0.0413544	0.569695	0.0334435	0.559364	0.0331257	0.621361	0.0269464
2	3	1	1e-05	1	6	1	0.301	0.60314	0.0379921	0.510137	0.0322608	0.24455	0.0389011	0.264877	0.0392279	0.143989	0.0411235	0.519606	0.0370496	0.485593	0.0367456	0.581508	0.0300172
2	3	1	1e-05	1	6	1	0.601	0.53372	0.0402355	0.396504	0.0358985	0.223219	0.0395742	0.251543	0.0400468	0.156933	0.0411081	0.400961	0.0393927	0.370107	0.0392588	0.441091	0.0544557
2	3	1	1e-05	1	11	0	0.001	0.629042	0.0318102	0.556733	0.0291356	0.261557	0.038403	0.288814	0.0378962	0.153638	0.0413171	0.59937	0.0308025	0.59332	0.0304599	0.64099	0.025567
2	3	1	1e-05	1	11	0	0.301	0.606574	0.0361247	0.527967	0.0310066	0.251942	0.0386067	0.273803	0.0385666	0.144042	0.0410998	0.537538	0.0350264	0.511695	0.0347409	0.608052	0.0273203
2	3	1	1e-05	1	11	0	0.601	0.531808	0.0395624	0.432316	0.0350282	0.231604	0.0393009	0.249314	0.0395446	0.156933	0.0411035	0.41998	0.0385154	0.385964	0.0384453	0.508327	0.0343501
2	3	1	1e-05	1	11	1	0.001	0.629042	0.0318102	0.556733	0.0291356	0.261557	0.038403	0.288814	0.0378962	0.153638	0.0413171	0.59937	0.0308025	0.59332	0.0304599	0.64099	0.025567
2	3	1	1e-05	1	11	1	0.301	0.606574	0.0361247	0.527967	0.0310066	0.251942	0.0386067	0.273803	0.0385666	0.144042	0.0410998	0.537538	0.0350264	0.511695	0.0347409	0.608052	0.0273203
2	3	1	1e-05	1	11	1	0.601	0.531808	0.0395624	0.432316	0.0350282	0.231604	0.0393009	0.249314	0.0395446	0.156933	0.0411035	0.41998	0.0385154	0.385964	0.0384453	0.508327	0.0343501
2	3	1	6e-05	0	1	0	0.001	0.625208	0.0347012	0.552197	0.0298241	0.254344	0.0386198	0.280117	0.0383769	0.153109	0.0413544	0.56961	0.0334527	0.559075	0.0331508	0.627498	0.0266668
2	3	1	6e-05	0	1	0	0.301	0.603187	0.0379911	0.5157	0.0321708	0.24306	0.0388904	0.264496	0.0392447	0.144018	0.0411235	0.519504	0.0370644	0.485418	0.0367463	0.585497	0.0309447
2	3	1	6e-05	0	1	0	0.601	0.533725	0.0402367	0.396449	0.0357391	0.223271	0.0395764	0.251545	0.0400497	0.156933	0.0411081	0.40097	0.039398	0.370104	0.039269	0.424171	0.0345577
2	3	1	6e-05	0	1	1	0.001	0.625208	0.0347012	0.552197	0.0298241	0.254344	0.0386198	0.280117	0.0383769	0.153109	0.0413544	0.56961	0.0334527	0.559075	0.0331508	0.627498	0.0266668
2	3	1	6e-05	0	1	1	0.301	0.603187	0.0379911	0.5157	0.0321708	0.24306	0.0388904	0.264496	0.0392447	0.144018	0.0411235	0.519504	0.0370644	0.485418	0.0367463	0.585497	0.0309447
2	3	1	6e-05	0	1	1	0.601	0.533725	0.0402367	0.396449	0.0357391	0.223271	0.0395764	0.251545	0.0400497	0.156933	0.0411081	0.40097	0.039398	0.370104	0.039269	0.424171	0.0345577
2	3	1	6e-05	0	6	0	0.001	0.638356	0.0268548	0.581701	0.0279578	0.271782	0.0380729	0.30752	0.0372402	0.156352	0.0411626	0.63588	0.0263506	0.626024	0.0264577	0.66005	0.0239497
2	3	1	6e-05	0	6	0	0.301	0.615601	0.0310727	0.568167	0.03006	0.264564	0.0384591	0.27295	0.0376962	0.145463	0.0410004	0.592275	0.0299023	0.574371	0.0299318	0.644005	0.0250276
2	3	1	6e-05	0	6	0	0.601	0.534575	0.0368121	0.524943	0.0310256	0.240417	0.0387581	0.257127	0.0385029	0.156933	0.0410807	0.446441	0.0356906	0.418447	0.0356318	0.559598	0.0300955
2	3	1	6e-05	0	6	1	0.001	0.638356	0.0268548	0.581701	0.0279578	0.271782	0.0380729	0.30752	0.0372402	0.156352	0.0411626	0.63588	0.0263506	0.626024	0.0264577	0.66005	0.0239497
2	3	1	6e-05	0	6	1	0.301	0.615601	0.0310727	0.568167	0.03006	0.264564	0.0384591	0.27295	0.0376962	0.145463	0.0410004	0.592275	0.0299023	0.574371	0.0299318	0.644005	0.0250276
2	3	1	6e-05	0	6	1	0.601	0.534575	0.0368121	0.524943	0.0310256	0.240417	0.0387581	0.257127	0.0385029	0.156933	0.0410807	0.446441	0.0356906	0.418447	0.0356318	0.559598	0.0300955
2	3	1	6e-05	0	11	0	0.001	0.640681	0.0256261	0.587363	0.0277068	0.27696	0.0379677	0.32046	0.0369925	0.158682	0.0410515	0.644535	0.0251064	0.630726	0.0254882	0.655856	0.0240269
2	3	1	6e-05	0	11	0	0.301	0.617722	0.0287479	0.57263	0.0299797	0.270572	0.0382503	0.274526	0.0380258	0.147923	0.0409005	0.612808	0.0275223	0.593555	0.0277915	0.642974	0.0249349
2	3	1	6e-05	0	11	0	0.601	0.534042	0.0349555	0.548728	0.0509116	0.24309	0.0387101	0.252542	0.0384748	0.157992	0.0410677	0.459004	0.0341919	0.426812	0.0343448	0.571914	0.0291117
2	3	1	6e-05	0	11	1	0.001	0.640681	0.0256261	0.587363	0.0277068	0.27696	0.0379677	0.32046	0.0369925	0.158682	0.0410515	0.644535	0.0251064	0.630726	0.0254882	0.655856	0.0240269
2	3	1	6e-05	0	11	1	0.301	0.617722	0.0287479	0.57263	0.0299797	0.270572	0.0382503	0.274526	0.0380258	0.147923	0.0409005	0.612808	0.0275223	0.593555	0.0277915	0.642974	0.0249349
2	3	1	6e-05	0	11	1	0.601	0.534042	0.0349555	0.548728	0.0509116	0.24309	0.0387101	0.252542	0.0384748	0.157992	0.0410677	0.459004	0.0341919	0.426812	0.0343448	0.571914	0.0291117
2	3	1	6e-05	1	1	0	0.001	0.625208	0.0347012	0.552197	0.0298241	0.254344	0.0386198	0.280117	0.0383769	0.153109	0.0413544	0.56961	0.0334527	0.559075	0.0331508	0.627498	0.0266668
2	3	1	6e-05	1	1	0	0.301	0.603187	0.0379911	0.5157	0.0321708	0.24306	0.0388904	0.264496	0.0392447	0.144018	0.0411235	0.519504	0.0370644	0.485418	0.0367463	0.585497	0.0309447
2	3	1	6e-05	1	1	0	0.601	0.533725	0.0402367	0.396449	0.0357391	0.223271	0.0395764	0.251545	0.0400497	0.156933	0.0411081	0.40097	0.039398	0.370104	0.039269	0.424171	0.0345577
2	3	1	6e-05	1	1	1	0.001	0.625208	0.0347012	0.552197	0.0298241	0.254344	0.0386198	0.280117	0.0383769	0.153109	0.0413544	0.56961	0.0334527	0.559075	0.0331508	0.627498	0.0266668
2	3	1	6e-05	1	1	1	0.301	0.603187	0.0379911	0.5157	0.0321708	0.24306	0.0388904	0.264496	0.0392447	0.144018	0.0411235	0.519504	0.0370644	0.485418	0.0367463	0.585497	0.0309447
2	3	1	6e-05	1	1	1	0.601	0.533725	0.0402367	0.396449	0.0357391	0.223271	0.0395764	0.251545	0.0400497	0.156933	0.0411081	0.40097	0.039398	0.370104	0.039269	0.424171	0.0345577
2	3	1	6e-05	1	6	0	0.001	0.638356	0.0268548	0.581701	0.0279578	0.271782	0.0380729	0.30752	0.0372402	0.156352	0.0411626	0.63588	0.0263506	0.626024	0.0264577	0.66005	0.0239497
2	3	1	6e-05	1	6	0	0.301	0.615601	0.0310727	0.568167	0.03006	0.264564	0.0384591	0.27295	0.0376962	0.145463	0.0410004	0.592275	0.0299023	0.574371	0.0299318	0.644005	0.0250276
2	3	1	6e-05	1	6	0	0.601	0.534575	0.0368121	0.524943	0.0310256	0.240417	0.0387581	0.257127	0.0385029	0.156933	0.0410807	0.446441	0.0356906	0.418447	0.0356318	0.559598	0.0300955
2	3	1	6e-05	1	6	1	0.001	0.638356	0.0268548	0.581701	0.0279578	0.271782	0.0380729	0.30752	0.0372402	0.156352	0.0411626	0.63588	0.0263506	0.626024	0.0264577	0.66005	0.0239497
2	3	1	6e-05	1	6	1	0.301	0.615601	0.0310727	0.568167	0.03006	0.264564	0.0384591	0.27295	0.0376962	0.145463	0.0410004	0.592275	0.0299023	0.574371	0.0299318	0.644005	0.0250276
2	3	1	6e-05	1	6	1	0.601	0.534575	0.0368121	0.524943	0.0310256	0.240417	0.0387581	0.257127	0.0385029	0.156933	0.0410807	0.446441	0.0356906	0.418447	0.0356318	0.559598	0.0300955
2	3	1	6e-05	1	11	0	0.001	0.640681	0.0256261	0.587363	0.0277068	0.27696	0.0379677	0.32046	0.0369925	0.158682	0.0410515	0.644535	0.0251064	0.630726	0.0254882	0.655856	0.0240269
2	3	1	6e-05	1	11	0	0.301	0.617722	0.0287479	0.57263	0.0299797	0.270572	0.0382503	0.274526	0.0380258	0.147923	0.0409005	0.612808	0.0275223	0.593555	0.0277915	0.642974	0.0249349
2	3	1	6e-05	1	11	0	0.601	0.534042	0.0349555	0.548728	0.0509116	0.24309	0.0387101	0.252542	0.0384748	0.157992	0.0410677	0.459004	0.0341919	0.426812	0.0343448	0.571914	0.0291117
2	3	1	6e-05	1	11	1	0.001	0.640681	0.0256261	0.587363	0.0277068	0.27696	0.0379677	0.32046	0.0369925	0.158682	0.0410515	0.644535	0.0251064	0.630726	0.0254882	0.655856	0.0240269
2	3	1	6e-05	1	11	1	0.301	0.617722	0.0287479	0.57263	0.0299797	0.270572	0.0382503	0.274526	0.0380258	0.147923	0.0409005	0.612808	0.0275223	0.593555	0.0277915	0.642974	0.0249349
2	3	1	6e-05	1	11	1	0.601	0.534042	0.0349555	0.548728	0.0509116	0.24309	0.0387101	0.252542	0.0384748	0.157992	0.0410677	0.459004	0.0341919	0.426812	0.0343448	0.571914	0.0291117
2	3	2	1e-05	0	1	0	0.001	0.619425	0.0398862	0.446281	0.0343462	0.229098	0.0395535	0.266393	0.040282	0.152631	0.0413844	0.500084	0.0392131	0.470778	0.038911	0.502586	0.0325919
2	3	2	1e-05	0	1	0	0.301	0.599502	0.0404869	0.402737	0.0364171	0.216623	0.0399536	0.256929	0.0405103	0.143566	0.0411477	0.465572	0.0400679	0.435379	0.0399178	0.4443	0.0351841
2	3	2	1e-05	0	1	0	0.601	0.534402	0.0409228	0.325779	0.0383055	0.20703	0.0405308	0.254541	0.0408699	0.156933	0.0411127	0.392419	0.0407703	0.364904	0.0407147	0.332361	0.0372362
2	3	2	1e-05	0	1	1	0.001	0.619425	0.0398862	0.446281	0.0343462	0.229098	0.0395535	0.266393	0.040282	0.152631	0.0413844	0.500084	0.0392131	0.470778	0.038911	0.502586	0.0325919
2	3	2	1e-05	0	1	1	0.301	0.599502	0.0404869	0.402737	0.0364171	0.216623	0.0399536	0.256929	0.0405103	0.143566	0.0411477	0.465572	0.0400679	0.435379	0.0399178	0.4443	0.0351841
2	3	2	1e-05	0	1	1	0.601	0.534402	0.0409228	0.325779	0.0383055	0.20703	0.0405308	0.254541	0.0408699	0.156933	0.0411127	0.392419	0.0407703	0.364904	0.0407147	0.332361	0.0372362
2	3	2	1e-05	0	6	0	0.001	0.625218	0.034693	0.544663	0.0300494	0.254363	0.0386169	0.280174	0.0383721	0.153109	0.0413544	0.569695	0.0334435	0.559364	0.0331257	0.621361	0.0269464
2	3	2	1e-05	0	6	0	0.301	0.60314	0.0379921	0.510137	0.0322608	0.24455	0.0389011	0.264877	0.0392279	0.143989	0.0411235	0.519606	0.0370496	0.485593	0.0367456	0.581508	0.0300172
2	3	2	1e-05	0	6	0	0.601	0.53372	0.0402355	0.396504	0.0358985	0.223219	0.0395742	0.251543	0.0400468	0.156933	0.0411081	0.400961	0.0393927	0.370107	0.0392588	0.441091	0.0544557
2	3	2	1e-05	0	6	1	0.001	0.625218	0.034693	0.544663	0.0300494	0.254363	0.0386169	0.280174	0.0383721	0.153109	0.0413544	0.569695	0.0334435	0.559364	0.0331257	0.621361	0.0269464
2	3	2	1e-05	0	6	1	0.301	0.60314	0.0379921	0.510137	0.0322608	0.24455	0.0389011	0.264877	0.0392279	0.143989	0.0411235	0.519606	0.0370496	0.485593	0.0367456	0.581508	0.0300172
2	3	2	1e-05	0	6	1	0.601	0.53372	0.0402355	0.396504	0.0358985	0.223219	0.0395742	0.251543	0.0400468	0.156933	0.0411081	0.400961	0.0393927	0.370107	0.0392588	0.441091	0.0544557
2	3	2	1e-05	0	11	0	0.001	0.629042	0.0318102	0.556733	0.0291356	0.261557	0.038403	0.288814	0.0378962	0.153638	0.0413171	0.59937	0.0308025	0.59332	0.0304599	0.64099	0.025567
2	3	2	1e-05	0	11	0	0.301	0.606574	0.0361247	0.527967	0.0310066	0.251942	0.0386067	0.273803	0.0385666	0.144042	0.0410998	0.537538	0.0350264	0.511695	0.0347409	0.608052	0.0273203
2	3	2	1e-05	0	11	0	0.601	0.531808	0.0395624	0.432316	0.0350282	0.231604	0.0393009	0.249314	0.0395446	0.156933	0.0411035	0.41998	0.0385154	0.385964	0.0384453	0.508327	0.0343501
2	3	2	1e-05	0	11	1	0.001	0.629042	0.0318102	0.556733	0.0291356	0.261557	0.038403	0.288814	0.0378962	0.153638	0.0413171	0.59937	0.0308025	0.59332	0.0304599	0.64099	0.025567
2	3	2	1e-05	0	11	1	0.301	0.606574	0.0361247	0.527967	0.0310066	0.251942	0.0386067	0.273803	0.0385666	0.144042	0.0410998	0.537538	0.0350264	0.511695	0.0347409	0.608052	0.0273203
2	3	2	1e-05	0	11	1	0.601	0.531808	0.0395624	0.432316	0.0350282	0.231604	0.0393009	0.249314	0.0395446	0.156933	0.0411035	0.41998	0.0385154	0.385964	0.0384453	0.508327	0.0343501
2	3	2	1e-05	1	1	0	0.001	0.619425	0.0398862	0.446281	0.0343462	0.229098	0.0395535	0.266393	0.040282	0.152631	0.0413844	0.500084	0.0392131	0.470778	0.038911	0.502586	0.0325919
2	3	2	1e-05	1	1	0	0.301	0.599502	0.0404869	0.402737	0.0364171	0.216623	0.0399536	0.256929	0.0405103	0.143566	0.0411477	0.465572	0.0400679	0.435379	0.0399178	0.4443	0.0351841
2	3	2	1e-05	1	1	0	0.601	0.534402	0.0409228	0.325779	0.0383055	0.20703	0.0405308	0.254541	0.0408699	0.156933	0.0411127	0.392419	0.0407703	0.364904	0.0407147	0.332361	0.0372362
2	3	2	1e-05	1	1	1	0.001	0.619425	0.0398862	0.446281	0.0343462	0.229098	0.0395535	0.266393	0.040282	0.152631	0.0413844	0.500084	0.0392131	0.470778	0.038911	0.502586	0.0325919
2	3	2	1e-05	1	1	1	0.301	0.599502	0.0404869	0.402737	0.0364171	0.216623	0.0399536	0.256929	0.0405103	0.143566	0.0411477	0.465572	0.0400679	0.435379	0.0399178	0.4443	0.0351841
2	3	2	1e-05	1	1	1	0.601	0.534402	0.0409228	0.325779	0.0383055	0.20703	0.0405308	0.254541	0.0408699	0.156933	0.0411127	0.392419	0.0407703	0.364904	0.0407147	0.332361	0.0372362
2	3	2	1e-05	1	6	0	0.001	0.625218	0.034693	0.544663	0.0300494	0.254363	0.0386169	0.280174	0.0383721	0.153109	0.0413544	0.569695	0.0334435	0.559364	0.0331257	0.621361	0.0269464
2	3	2	1e-05	1	6	0	0.301	0.60314	0.0379921	0.510137	0.0322608	0.24455	0.0389011	0.264877	0.0392279	0.143989	0.0411235	0.519606	0.0370496	0.485593	0.0367456	0.581508	0.0300172
2	3	2	1e-05	1	6	0	0.601	0.53372	0.0402355	0.396504	0.0358985	0.223219	0.0395742	0.251543	0.0400468	0.156933	0.0411081	0.400961	0.0393927	0.370107	0.0392588	0.441091	0.0544557
2	3	2	1e-05	1	6	1	0.001	0.625218	0.034693	0.544663	0.0300494	0.254363	0.0386169	0.280174	0.0383721	0.153109	0.0413544	0.569695	0.0334435	0.559364	0.0331257	0.621361	0.0269464
2	3	2	1e-05	1	6	1	0.301	0.60314	0.0379921	0.510137	0.0322608	0.24455	0.0389011	0.264877	0.0392279	0.143989	0.0411235	0.519606	0.0370496	0.485593	0.0367456	0.581508	0.0300172
2	3	2	1e-05	1	6	1	0.601	0.53372	0.0402355	0.396504	0.0358985	0.223219	0.0395742	0.251543	0.0400468	0.156933	0.0411081	0.400961	0.0393927	0.370107	0.0392588	0.441091	0.0544557
2	3	2	1e-05	1	11	0	0.001	0.629042	0.0318102	0.556733	0.0291356	0.261557	0.038403	0.288814	0.0378962	0.153638	0.0413171	0.59937	0.0308025	0.59332	0.0304599	0.64099	0.025567
2	3	2	1e-05	1	11	0	0.301	0.606574	0.0361247	0.527967	0.0310066	0.251942	0.0386067	0.273803	0.0385666	0.144042	0.0410998	0.537538	0.0350264	0.511695	0.0347409	0.608052	0.0273203
2	3	2	1e-05	1	11	0	0.601	0.531808	0.0395624	0.432316	0.0350282	0.231604	0.0393009	0.249314	0.0395446	0.156933	0.0411035	0.41998	0.0385154	0.385964	0.0384453	0.508327	0.0343501
2	3	2	1e-05	1	11	1	0.001	0.629042	0.0318102	0.556733	0.0291356	0.261557	0.038403	0.288814	0.0378962	0.153638	0.0413171	0.59937	0.0308025	0.59332	0.0304599	0.64099	0.025567
2	3	2	1e-05	1	11	1	0.301	0.606574	0.0361247	0.527967	0.0310066	0.251942	0.0386067	0.273803	0.0385666	0.144042	0.0410998	0.537538	0.0350264	0.511695	0.0347409	0.608052	0.0273203
2	3	2	1e-05	1	11	1	0.601	0.531808	0.0395624	0.432316	0.0350282	0.231604	0.0393009	0.249314	0.0395446	0.156933	0.0411035	0.41998	0.0385154	0.385964	0.0384453	0.508327	0.0343501
2	3	2	6e-05	0	1	0	0.001	0.625208	0.0347012	0.552197	0.0298241	0.254344	0.0386198	0.280117	0.0383769	0.153109	0.0413544	0.56961	0.0334527	0.559075	0.0331508	0.627498	0.0266668
2	3	2	6e-05	0	1	0	0.301	0.603187	0.0379911	0.5157	0.0321708	0.24306	0.0388904	0.264496	0.0392447	0.144018	0.0411235	0.519504	0.0370644	0.485418	0.0367463	0.585497	0.0309447
2	3	2	6e-05	0	1	0	0.601	0.533725	0.0402367	0.396449	0.0357391	0.223271	0.0395764	0.251545	0.0400497	0.156933	0.0411081	0.40097	0.039398	0.370104	0.039269	0.424171	0.0345577
2	3	2	6e-05	0	1	1	0.001	0.625208	0.0347012	0.552197	0.0298241	0.254344	0.0386198	0.280117	0.0383769	0.153109	0.0413544	0.56961	0.0334527	0.559075	0.0331508	0.627498	0.0266668
2	3	2	6e-05	0	1	1	0.301	0.603187	0.0379911	0.5157	0.0321708	0.24306	0.0388904	0.264496	0.0392447	0.144018	0.0411235	0.519504	0.0370644	0.485418	0.0367463	0.585497	0.0309447
2	3	2	6e-05	0	1	1	0.601	0.533725	0.0402367	0.396449	0.0357391	0.223271	0.0395764	0.251545	0.0400497	0.156933	0.0411081	0.40097	0.039398	0.370104	0.039269	0.424171	0.0345577
2	3	2	6e-05	0	6	0	0.001	0.638356	0.0268548	0.581701	0.0279578	0.271782	0.0380729	0.30752	0.0372402	0.156352	0.0411626	0.63588	0.0263506	0.626024	0.0264577	0.66005	0.0239497
2	3	2	6e-05	0	6	0	0.301	0.615601	0.0310727	0.568167	0.03006	0.264564	0.0384591	0.27295	0.0376962	0.145463	0.0410004	0.592275	0.0299023	0.574371	0.0299318	0.644005	0.0250276
2	3	2	6e-05	0	6	0	0.601	0.534575	0.0368121	0.524943	0.0310256	0.240417	0.0387581	0.257127	0.0385029	0.156933	0.0410807	0.446441	0.0356906	0.418447	0.0356318	0.559598	0.0300955
2	3	2	6e-05	0	6	1	0.001	0.638356	0.0268548	0.581701	0.0279578	0.271782	0.0380729	0.30752	0.0372402	0.156352	0.0411626	0.63588	0.0263506	0.626024	0.0264577	0.66005	0.0239497
2	3	2	6e-05	0	6	1	0.301	0.615601	0.0310727	0.568167	0.03006	0.264564	0.0384591	0.27295	0.0376962	0.145463	0.0410004	0.592275	0.0299023	0.574371	0.0299318	0.644005	0.0250276
2	3	2	6e-05	0	6	1	0.601	0.534575	0.0368121	0.524943	0.0310256	0.240417	0.0387581	0.257127	0.0385029	0.156933	0.0410807	0.446441	0.0356906	0.418447	0.0356318	0.559598	0.0300955
2	3	2	6e-05	0	11	0	0.001	0.640681	0.0256261	0.587363	0.0277068	0.27696	0.0379677	0.32046	0.0369925	0.158682	0.0410515	0.644535	0.0251064	0.630726	0.0254882	0.655856	0.0240269
2	3	2	6e-05	0	11	0	0.301	0.617722	0.0287479	0.57263	0.0299797	0.270572	0.0382503	0.274526	0.0380258	0.147923	0.0409005	0.612808	0.0275223	0.593555	0.0277915	0.642974	0.0249349
2	3	2	6e-05	0	11	0	0.601	0.534042	0.0349555	0.548728	0.0509116	0.24309	0.0387101	0.252542	0.0384748	0.157992	0.0410677	0.459004	0.0341919	0.426812	0.0343448	0.571914	0.0291117
2	3	2	6e-05	0	11	1	0.001	0.640681	0.0256261	0.587363	0.0277068	0.27696	0.0379677	0.32046	0.0369925	0.158682	0.0410515	0.644535	0.0251064	0.630726	0.0254882	0.655856	0.0240269
2	3	2	6e-05	0	11	1	0.301	0.617722	0.0287479	0.57263	0.0299797	0.270572	0.0382503	0.274526	0.0380258	0.147923	0.0409005	0.612808	0.0275223	0.593555	0.0277915	0.642974	0.0249349
2	3	2	6e-05	0	11	1	0.601	0.534042	0.0349555	0.548728	0.0509116	0.24309	0.0387101	0.252542	0.0384748	0.157992	0.0410677	0.459004	0.0341919	0.426812	0.0343448	0.571914	0.0291117
2	3	2	6e-05	1	1	0	0.001	0.625208	0.0347012	0.552197	0.0298241	0.254344	0.0386198	0.280117	0.0383769	0.153109	0.0413544	0.56961	0.0334527	0.559075	0.0331508	0.627498	0.0266668
2	3	2	6e-05	1	1	0	0.301	0.603187	0.0379911	0.5157	0.0321708	0.24306	0.0388904	0.264496	0.0392447	0.144018	0.0411235	0.519504	0.0370644	0.485418	0.0367463	0.585497	0.0309447
2	3	2	6e-05	1	1	0	0.601	0.533725	0.0402367	0.396449	0.0357391	0.223271	0.0395764	0.251545	0.0400497	0.156933	0.0411081	0.40097	0.039398	0.370104	0.039269	0.424171	0.0345577
2	3	2	6e-05	1	1	1	0.001	0.625208	0.0347012	0.552197	0.0298241	0.254344	0.0386198	0.280117	0.0383769	0.153109	0.0413544	0.56961	0.0334527	0.559075	0.0331508	0.627498	0.0266668
2	3	2	6e-05	1	1	1	0.301	0.603187	0.0379911	0.5157	0.0321708	0.24306	0.0388904	0.264496	0.0392447	0.144018	0.0411235	0.519504	0.0370644	0.485418	0.0367463	0.585497	0.0309447
2	3	2	6e-05	1	1	1	0.601	0.533725	0.0402367	0.396449	0.0357391	0.223271	0.0395764	0.251545	0.0400497	0.156933	0.0411081	0.40097	0.039398	0.370104	0.039269	0.424171	0.0345577
2	3	2	6e-05	1	6	0	0.001	0.638356	0.0268548	0.581701	0.0279578	0.271782	0.0380729	0.30752	0.0372402	0.156352	0.0411626	0.63588	0.0263506	0.626024	0.0264577	0.66005	0.0239497
2	3	2	6e-05	1	6	0	0.301	0.615601	0.0310727	0.568167	0.03006	0.264564	0.0384591	0.27295	0.0376962	0.145463	0.0410004	0.592275	0.0299023	0.574371	0.0299318	0.644005	0.0250276
2	3	2	6e-05	1	6	0	0.601	0.534575	0.0368121	0.524943	0.0310256	0.240417	0.0387581	0.257127	0.0385029	0.156933	0.0410807	0.446441	0.0356906	0.418447	0.0356318	0.559598	0.0300955
2	3	2	6e-05	1	6	1	0.001	0.638356	0.0268548	0.581701	0.0279578	0.271782	0.0380729	0.30752	0.0372402	0.156352	0.0411626	0.63588	0.0263506	0.626024	0.0264577	0.66005	0.0239497
2	3	2	6e-05	1	6	1	0.301	0.615601	0.0310727	0.568167	0.03006	0.264564	0.0384591	0.27295	0.0376962	0.145463	0.0410004	0.592275	0.0299023	0.574371	0.0299318	0.644005	0.0250276
2	3	2	6e-05	1	6	1	0.601	0.534575	0.0368121	0.524943	0.0310256	0.240417	0.0387581	0.257127	0.0385029	0.156933	0.0410807	0.446441	0.0356906	0.418447	0.0356318	0.559598	0.0300955
2	3	2	6e-05	1	11	0	0.001	0.640681	0.0256261	0.587363	0.0277068	0.27696	0.0379677	0.32046	0.0369925	0.158682	0.0410515	0.644535	0.0251064	0.630726	0.0254882	0.655856	0.0240269
2	3	2	6e-05	1	11	0	0.301	0.617722	0.0287479	0.57263	0.0299797	0.270572	0.0382503	0.274526	0.0380258	0.147923	0.0409005	0.612808	0.0275223	0.593555	0.0277915	0.642974	0.0249349
2	3	2	6e-05	1	11	0	0.601	0.534042	0.0349555	0.548728	0.0509116	0.24309	0.0387101	0.252542	0.0384748	0.157992	0.0410677	0.459004	0.0341919	0.426812	0.0343448	0.571914	0.0291117
2	3	2	6e-05	1	11	1	0.001	0.640681	0.0256261	0.587363	0.0277068	0.27696	0.0379677	0.32046	0.0369925	0.158682	0.0410515	0.644535	0.0251064	0.630726	0.0254882	0.655856	0.0240269
2	3	2	6e-05	1	11	1	0.301	0.617722	0.0287479	0.57263	0.0299797	0.270572	0.0382503	0.274526	0.0380258	0.147923	0.0409005	0.612808	0.0275223	0.593555	0.0277915	0.642974	0.0249349
2	3	2	6e-05	1	11	1	0.601	0.534042	0.0349555	0.548728	0.0509116	0.24309	0.0387101	0.252542	0.0384748	0.157992	0.0410677	0.459004	0.0341919	0.426812	0.0343448	0.571914	0.0291117
2	3	3	1e-05	0	1	0	0.001	0.619425	0.0398862	0.446281	0.0343462	0.229098	0.0395535	0.266393	0.040282	0.152631	0.0413844	0.500084	0.0392131	0.470778	0.038911	0.502586	0.0325919
2	3	3	1e-05	0	1	0	0.301	0.599502	0.0404869	0.402737	0.0364171	0.216623	0.0399536	0.256929	0.0405103	0.143566	0.0411477	0.465572	0.0400679	0.435379	0.0399178	0.4443	0.0351841
2	3	3	1e-05	0	1	0	0.601	0.534402	0.0409228	0.325779	0.0383055	0.20703	0.0405308	0.254541	0.0408699	0.156933	0.0411127	0.392419	0.0407703	0.364904	0.0407147	0.332361	0.0372362
2	3	3	1e-05	0	1	1	0.001	0.619425	0.0398862	0.446281	0.0343462	0.229098	0.0395535	0.266393	0.040282	0.152631	0.0413844	0.500084	0.0392131	0.470778	0.038911	0.502586	0.0325919
2	3	3	1e-05	0	1	1	0.301	0.599502	0.0404869	0.402737	0.0364171	0.216623	0.0399536	0.256929	0.0405103	0.143566	0.0411477	0.465572	0.0400679	0.435379	0.0399178	0.4443	0.0351841
2	3	3	1e-05	0	1	1	0.601	0.534402	0.0409228	0.325779	0.0383055	0.20703	0.0405308	0.254541	0.0408699	0.156933	0.0411127	0.392419	0.0407703	0.364904	0.0407147	0.332361	0.0372362
2	3	3	1e-05	0	6	0	0.001	0.625218	0.034693	0.544663	0.0300494	0.254363	0.0386169	0.280174	0.0383721	0.153109	0.0413544	0.569695	0.0334435	0.559364	0.0331257	0.621361	0.0269464
2	3	3	1e-05	0	6	0	0.301	0.60314	0.0379921	0.510137	0.0322608	0.24455	0.0389011	0.264877	0.0392279	0.143989	0.0411235	0.519606	0.0370496	0.485593	0.0367456	0.581508	0.0300172
2	3	3	1e-05	0	6	0	0.601	0.53372	0.0402355	0.396504	0.0358985	0.223219	0.0395742	0.251543	0.0400468	0.156933	0.0411081	0.400961	0.0393927	0.370107	0.0392588	0.441091	0.0544557
2	3	3	1e-05	0	6	1	0.001	0.625218	0.034693	0.544663	0.0300494	0.254363	0.0386169	0.280174	0.0383721	0.153109	0.0413544	0.569695	0.0334435	0.559364	0.0331257	0.621361	0.0269464
2	3	3	1e-05	0	6	1	0.301	0.60314	0.0379921	0.510137	0.0322608	0.24455	0.0389011	0.264877	0.0392279	0.143989	0.0411235	0.519606	0.0370496	0.485593	0.0367456	0.581508	0.0300172
2	3	3	1e-05	0	6	1	0.601	0.53372	0.0402355	0.396504	0.0358985	0.223219	0.0395742	0.251543	0.0400468	0.156933	0.0411081	0.400961	0.0393927	0.370107	0.0392588	0.441091	0.0544557
2	3	3	1e-05	0	11	0	0.001	0.629042	0.0318102	0.556733	0.0291356	0.261557	0.038403	0.288814	0.0378962	0.153638	0.0413171	0.59937	0.0308025	0.59332	0.0304599	0.64099	0.025567
2	3	3	1e-05	0	11	0	0.301	0.606574	0.0361247	0.527967	0.0310066	0.251942	0.0386067	0.273803	0.0385666	0.144042	0.0410998	0.537538	0.0350264	0.511695	0.0347409	0.608052	0.0273203
2	3	3	1e-05	0	11	0	0.601	0.531808	0.0395624	0.432316	0.0350282	0.231604	0.0393009	0.249314	0.0395446	0.156933	0.0411035	0.41998	0.0385154	0.385964	0.0384453	0.508327	0.0343501
2	3	3	1e-05	0	11	1	0.001	0.629042	0.0318102	0.556733	0.0291356	0.261557	0.038403	0.288814	0.0378962	0.153638	0.0413171	0.59937	0.0308025	0.59332	0.0304599	0.64099	0.025567
2	3	3	1e-05	0	11	1	0.301	0.606574	0.0361247	0.527967	0.0310066	0.251942	0.0386067	0.273803	0.0385666	0.144042	0.0410998	0.537538	0.0350264	0.511695	0.0347409	0.608052	0.0273203
2	3	3	1e-05	0	11	1	0.601	0.531808	0.0395624	0.432316	0.0350282	0.231604	0.0393009	0.249314	0.0395446	0.156933	0.0411035	0.41998	0.0385154	0.385964	0.0384453	0.508327	0.0343501
2	3	3	1e-05	1	1	0	0.001	0.619425	0.0398862	0.446281	0.0343462	0.229098	0.0395535	0.266393	0.040282	0.152631	0.0413844	0.500084	0.0392131	0.470778	0.038911	0.502586	0.0325919
2	3	3	1e-05	1	1	0	0.301	0.599502	0.0404869	0.402737	0.0364171	0.216623	0.0399536	0.256929	0.0405103	0.143566	0.0411477	0.465572	0.0400679	0.435379	0.0399178	0.4443	0.0351841
2	3	3	1e-05	1	1	0	0.601	0.534402	0.0409228	0.325779	0.0383055	0.20703	0.0405308	0.254541	0.0408699	0.156933	0.0411127	0.392419	0.0407703	0.364904	0.0407147	0.332361	0.0372362
2	3	3	1e-05	1	1	1	0.001	0.619425	0.0398862	0.446281	0.0343462	0.229098	0.0395535	0.266393	0.040282	0.152631	0.0413844	0.500084	0.0392131	0.470778	0.038911	0.502586	0.0325919
2	3	3	1e-05	1	1	1	0.301	0.599502	0.0404869	0.402737	0.0364171	0.216623	0.0399536	0.256929	0.0405103	0.143566	0.0411477	0.465572	0.0400679	0.435379	0.0399178	0.4443	0.0351841
2	3	3	1e-05	1	1	1	0.601	0.534402	0.0409228	0.325779	0.0383055	0.20703	0.0405308	0.254541	0.0408699	0.156933	0.0411127	0.392419	0.0407703	0.364904	0.0407147	0.332361	0.0372362
2	3	3	1e-05	1	6	0	0.001	0.625218	0.034693	0.544663	0.0300494	0.254363	0.0386169	0.280174	0.0383721	0.153109	0.0413544	0.569695	0.0334435	0.559364	0.0331257	0.621361	0.0269464
2	3	3	1e-05	1	6	0	0.301	0.60314	0.0379921	0.510137	0.0322608	0.24455	0.0389011	0.264877	0.0392279	0.143989	0.0411235	0.519606	0.0370496	0.485593	0.0367456	0.581508	0.0300172
2	3	3	1e-05	1	6	0	0.601	0.53372	0.0402355	0.396504	0.0358985	0.223219	0.0395742	0.251543	0.0400468	0.156933	0.0411081	0.400961	0.0393927	0.370107	0.0392588	0.441091	0.0544557
2	3	3	1e-05	1	6	1	0.001	0.625218	0.034693	0.544663	0.0300494	0.254363	0.0386169	0.280174	0.0383721	0.153109	0.0413544	0.569695	0.0334435	0.559364	0.0331257	0.621361	0.0269464
2	3	3	1e-05	1	6	1	0.301	0.60314	0.0379921	0.510137	0.0322608	0.24455	0.0389011	0.264877	0.0392279	0.143989	0.0411235	0.519606	0.0370496	0.485593	0.0367456	0.581508	0.0300172
2	3	3	1e-05	1	6	1	0.601	0.53372	0.0402355	0.396504	0.0358985	0.223219	0.0395742	0.251543	0.0400468	0.156933	0.0411081	0.400961	0.0393927	0.370107	0.0392588	0.441091	0.0544557
2	3	3	1e-05	1	11	0	0.001	0.629042	0.0318102	0.556733	0.0291356	0.261557	0.038403	0.288814	0.0378962	0.153638	0.0413171	0.59937	0.0308025	0.59332	0.0304599	0.64099	0.025567
2	3	3	1e-05	1	11	0	0.301	0.606574	0.0361247	0.527967	0.0310066	0.251942	0.0386067	0.273803	0.0385666	0.144042	0.0410998	0.537538	0.0350264	0.511695	0.0347409	0.608052	0.0273203
2	3	3	1e-05	1	11	0	0.601	0.531808	0.0395624	0.432316	0.0350282	0.231604	0.0393009	0.249314	0.0395446	0.156933	0.0411035	0.41998	0.0385154	0.385964	0.0384453	0.508327	0.0343501
2	3	3	1e-05	1	11	1	0.001	0.629042	0.0318102	0.556733	0.0291356	0.261557	0.038403	0.288814	0.0378962	0.153638	0.0413171	0.59937	0.0308025	0.59332	0.0304599	0.64099	0.025567
2	3	3	1e-05	1	11	1	0.301	0.606574	0.0361247	0.527967	0.0310066	0.251942	0.0386067	0.273803	0.0385666	0.144042	0.0410998	0.537538	0.0350264	0.511695	0.0347409	0.608052	0.0273203
2	3	3	1e-05	1	11	1	0.601	0.531808	0.0395624	0.432316	0.0350282	0.231604	0.0393009	0.249314	0.0395446	0.156933	0.0411035	0.41998	0.0385154	0.385964	0.0384453	0.508327	0.0343501
2	3	3	6e-05	0	1	0	0.001	0.625208	0.0347012	0.552197	0.0298241	0.254344	0.0386198	0.280117	0.0383769	0.153109	0.0413544	0.56961	0.0334527	0.559075	0.0331508	0.627498	0.0266668
2	3	3	6e-05	0	1	0	0.301	0.603187	0.0379911	0.5157	0.0321708	0.24306	0.0388904	0.264496	0.0392447	0.144018	0.0411235	0.519504	0.0370644	0.485418	0.0367463	0.585497	0.0309447
2	3	3	6e-05	0	1	0	0.601	0.533725	0.0402367	0.396449	0.0357391	0.223271	0.0395764	0.251545	0.0400497	0.156933	0.0411081	0.40097	0.039398	0.370104	0.039269	0.424171	0.0345577
2	3	3	6e-05	0	1	1	0.001	0.625208	0.0347012	0.552197	0.0298241	0.254344	0.0386198	0.280117	0.0383769	0.153109	0.0413544	0.56961	0.0334527	0.559075	0.0331508	0.627498	0.0266668
2	3	3	6e-05	0	1	1	0.301	0.603187	0.0379911	0.5157	0.0321708	0.24306	0.0388904	0.264496	0.0392447	0.144018	0.0411235	0.519504	0.0370644	0.485418	0.0367463	0.585497	0.0309447
2	3	3	6e-05	0	1	1	0.601	0.533725	0.0402367	0.396449	0.0357391	0.223271	0.0395764	0.251545	0.0400497	0.156933	0.0411081	0.40097	0.039398	0.370104	0.039269	0.424171	0.0345577
2	3	3	6e-05	0	6	0	0.001	0.638356	0.0268548	0.581701	0.0279578	0.271782	0.0380729	0.30752	0.0372402	0.156352	0.0411626	0.63588	0.0263506	0.626024	0.0264577	0.66005	0.0239497
2	3	3	6e-05	0	6	0	0.301	0.615601	0.0310727	0.568167	0.03006	0.264564	0.0384591	0.27295	0.0376962	0.145463	0.0410004	0.592275	0.0299023	0.574371	0.0299318	0.644005	0.0250276
2	3	3	6e-05	0	6	0	0.601	0.534575	0.0368121	0.524943	0.0310256	0.240417	0.0387581	0.257127	0.0385029	0.156933	0.0410807	0.446441	0.0356906	0.418447	0.0356318	0.559598	0.0300955
2	3	3	6e-05	0	6	1	0.001	0.638356	0.0268548	0.581701	0.0279578	0.271782	0.0380729	0.30752	0.0372402	0.156352	0.0411626	0.63588	0.0263506	0.626024	0.0264577	0.66005	0.0239497
2	3	3	6e-05	0	6	1	0.301	0.615601	0.0310727	0.568167	0.03006	0.264564	0.0384591	0.27295	0.0376962	0.145463	0.0410004	0.592275	0.0299023	0.574371	0.0299318	0.644005	0.0250276
2	3	3	6e-05	0	6	1	0.601	0.534575	0.0368121	0.524943	0.0310256	0.240417	0.0387581	0.257127	0.0385029	0.156933	0.0410807	0.446441	0.0356906	0.418447	0.0356318	0.559598	0.0300955
2	3	3	6e-05	0	11	0	0.001	0.640681	0.0256261	0.587363	0.0277068	0.27696	0.0379677	0.32046	0.0369925	0.158682	0.0410515	0.644535	0.0251064	0.630726	0.0254882	0.655856	0.0240269
2	3	3	6e-05	0	11	0	0.301	0.617722	0.0287479	0.57263	0.0299797	0.270572	0.0382503	0.274526	0.0380258	0.147923	0.0409005	0.612808	0.0275223	0.593555	0.0277915	0.642974	0.0249349
2	3	3	6e-05	0	11	0	0.601	0.534042	0.0349555	0.548728	0.0509116	0.24309	0.0387101	0.252542	0.0384748	0.157992	0.0410677	0.459004	0.0341919	0.426812	0.0343448	0.571914	0.0291117
2	3	3	6e-05	0	11	1	0.001	0.640681	0.0256261	0.587363	0.0277068	0.27696	0.0379677	0.32046	0.0369925	0.158682	0.0410515	0.644535	0.0251064	0.630726	0.0254882	0.655856	0.0240269
2	3	3	6e-05	0	11	1	0.301	0.617722	0.0287479	0.57263	0.0299797	0.270572	0.0382503	0.274526	0.0380258	0.147923	0.0409005	0.612808	0.0275223	0.593555	0.0277915	0.642974	0.0249349
2	3	3	6e-05	0	11	1	0.601	0.534042	0.0349555	0.548728	0.0509116	0.24309	0.0387101	0.252542	0.0384748	0.157992	0.0410677	0.459004	0.0341919	0.426812	0.0343448	0.571914	0.0291117
2	3	3	6e-05	1	1	0	0.001	0.625208	0.0347012	0.552197	0.0298241	0.254344	0.0386198	0.280117	0.0383769	0.153109	0.0413544	0.56961	0.0334527	0.559075	0.0331508	0.627498	0.0266668
2	3	3	6e-05	1	1	0	0.301	0.603187	0.0379911	0.5157	0.0321708	0.24306	0.0388904	0.264496	0.0392447	0.144018	0.0411235	0.519504	0.0370644	0.485418	0.0367463	0.585497	0.0309447
2	3	3	6e-05	1	1	0	0.601	0.533725	0.0402367	0.396449	0.0357391	0.223271	0.0395764	0.251545	0.0400497	0.156933	0.0411081	0.40097	0.039398	0.370104	0.039269	0.424171	0.0345577
2	3	3	6e-05	1	1	1	0.001	0.625208	0.0347012	0.552197	0.0298241	0.254344	0.0386198	0.280117	0.0383769	0.153109	0.0413544	0.56961	0.0334527	0.559075	0.0331508	0.627498	0.0266668
2	3	3	6e-05	1	1	1	0.301	0.603187	0.0379911	0.5157	0.0321708	0.24306	0.0388904	0.264496	0.0392447	0.144018	0.0411235	0.519504	0.0370644	0.485418	0.0367463	0.585497	0.0309447
2	3	3	6e-05	1	1	1	0.601	0.533725	0.0402367	0.396449	0.0357391	0.223271	0.0395764	0.251545	0.0400497	0.156933	0.0411081	0.40097	0.039398	0.370104	0.039269	0.424171	0.0345577
2	3	3	6e-05	1	6	0	0.001	0.638356	0.0268548	0.581701	0.0279578	0.271782	0.0380729	0.30752	0.0372402	0.156352	0.0411626	0.63588	0.0263506	0.626024	0.0264577	0.66005	0.0239497
2	3	3	6e-05	1	6	0	0.301	0.615601	0.0310727	0.568167	0.03006	0.264564	0.0384591	0.27295	0.0376962	0.145463	0.0410004	0.592275	0.0299023	0.574371	0.0299318	0.644005	0.0250276
2	3	3	6e-05	1	6	0	0.601	0.534575	0.0368121	0.524943	0.0310256	0.240417	0.0387581	0.257127	0.0385029	0.156933	0.0410807	0.446441	0.0356906	0.418447	0.0356318	0.559598	0.0300955
2	3	3	6e-05	1	6	1	0.001	0.638356	0.0268548	0.581701	0.0279578	0.271782	0.0380729	0.30752	0.0372402	0.156352	0.0411626	0.63588	0.0263506	0.626024	0.0264577	0.66005	0.0239497
2	3	3	6e-05	1	6	1	0.301	0.615601	0.0310727	0.568167	0.03006	0.264564	0.0384591	0.27295	0.0376962	0.145463	0.0410004	0.592275	0.0299023	0.574371	0.0299318	0.644005	0.0250276
2	3	3	6e-05	1	6	1	0.601	0.534575	0.0368121	0.524943	0.0310256	0.240417	0.0387581	0.257127	0.0385029	0.156933	0.0410807	0.446441	0.0356906	0.418447	0.0356318	0.559598	0.0300955
2	3	3	6e-05	1	11	0	0.001	0.640681	0.0256261	0.587363	0.0277068	0.27696	0.0379677	0.32046	0.0369925	0.158682	0.0410515	0.644535	0.0251064	0.630726	0.0254882	0.655856	0.0240269
2	3	3	6e-05	1	11	0	0.301	0.617722	0.0287479	0.57263	0.0299797	0.270572	0.0382503	0.274526	0.0380258	0.147923	0.0409005	0.612808	0.0275223	0.593555	0.0277915	0.642974	0.0249349
2	3	3	6e-05	1	11	0	0.601	0.534042	0.0349555	0.548728	0.0509116	0.24309	0.0387101	0.252542	0.0384748	0.157992	0.0410677	0.459004	0.0341919	0.426812	0.0343448	0.571914	0.0291117
2	3	3	6e-05	1	11	1	0.001	0.640681	0.0256261	0.587363	0.0277068	0.27696	0.0379677	0.32046	0.0369925	0.158682	0.0410515	0.644535	0.0251064	0.630726	0.0254882	0.655856	0.0240269
2	3	3	6e-05	1	11	1	0.301	0.617722	0.0287479	0.57263	0.0299797	0.270572	0.0382503	0.274526	0.0380258	0.147923	0.0409005	0.612808	0.0275223	0.593555	0.0277915	0.642974	0.0249349
2	3	3	6e-05	1	11	1	0.601	0.534042	0.0349555	0.548728	0.0509116	0.24309	0.0387101	0.252542	0.0384748	0.157992	0.0410677	0.459004	0.0341919	0.426812	0.0343448	0.571914	0.0291117
